# Supplementary material for: Development and Field Evaluation of a Rapid Detection Method for Babesia microti using fluorescent recombinase polymerase amplification(RPA) technology
Source: Research Square preprint supplement (doi:10.21203/rs.3.rs-7755464/v1), 2025-12-03
Supplement: Supplementary file 1 [file 7c6bfedbf2127714d29e58b1.docx]

Table1. Primers for RPA method

| Login Number | Number | Primer sequence（5'→3'） | Length |
| --- | --- | --- | --- |
| MK609547.1 | 1 | CAGTTATAGTTTATTTGATGTTCGTTTTAC | 295bp |
| TCTTAGATGTGGTAGCCGTTTCTCAGG |
| 2 | GGAAAGCAGCAGGCGCGCAAATTACCCA | 243bp |
| GGAAGCGAGATTAATGACAAGGCAGA A |
| 3 | ATCTAAACCCTTCCCAGAGTATCAATTGGA | 338bp |
| CCAACTGCTCCTATTAACCATTACTCTGGC |
| 4 | CCAGAGTAATGGTTAATAGGAGCAGTTGG | 295bp |
| CTCTAGTCGGCATAGTTTATGGTTAGGAC |
| 6 | TCCAGACATAGAGAGGATTGACAGATTGAT | 222bp |
| ACCTGTTATTGCCTTACACTTCCTTGCGTT |
| 7 | CGGCTACCACATCTAAGGAAGGCACG | 191bp |
| CTATTGGAGCTGGAATTACCGCGGCT |

Table2. Primers for Nested PCR

|  | Primer name | Primer sequence（5'→3'） |
| --- | --- | --- |
| First round | CRYPTORN | GAATGATCCTTCCGCAGGTTCACCTAC |
| CRYPTOFL | AACCTGGTTGATCCTGCCAGTAGTCAT |
| Second round | Bab1 | GTCTTAGTATAAGCTTTTATACAGCG |
| Bab4 | GATAGGTCAGAAACTTGAATGATACATCG |

Table 3 Density of parasitess in various groups of blood *Babesia microti*

| Group | Density of *Babesia microti*（parasite/ul） |
| --- | --- |
| 1 | 445200 |
| 2 | 89040 |
| 3 | 17808 |
| 4 | 3561.6 |
| 5 | 712.32 |
| 6 | 142.46 |
| 7 | 28.49 |
| 8 | 5.7 |
| 9 | 1.14 |
| 10 | 0.23 |
| 11 | 0.046 |
| 12 | 0.0092 |
| 13 | 0.0018 |
| 14 | 0.00037 |

**
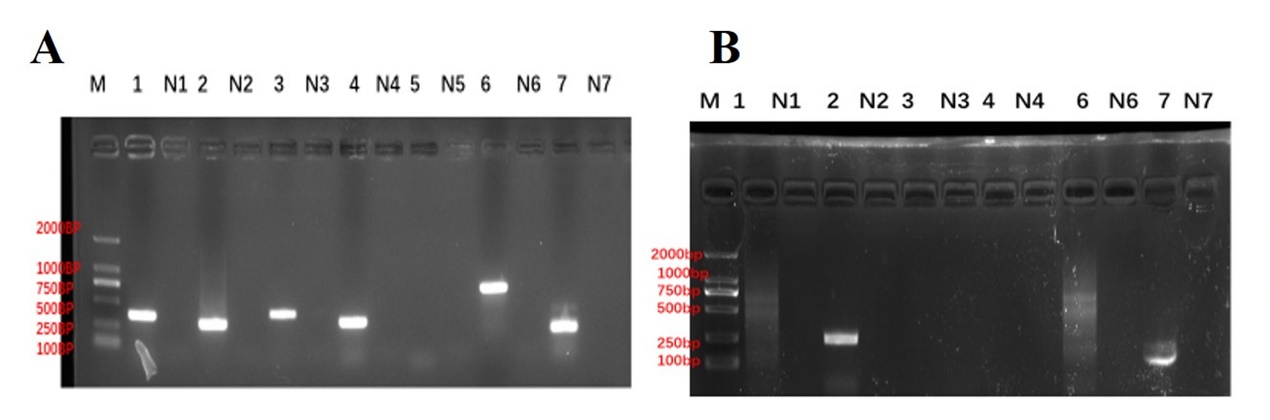
**

Figure1 PCR Results of RPA primers selection

(A) represent corresponds to primers for PCR, 1-7 from 18SrRNA .N1-N7 represent the negative control, M represents DNA makers. 1st, 2nd, 3rd, 4th, 6th, 7th-which produced positive PCR results. (B) 1, 2,3,4,6,7 represent corresponds to primers for RPA.N1、N2、N3、N4、N6、N7 represent the negative control, M represent DNA Makers. The 2nd, 7th primer groups yielded clear, distinct bands.


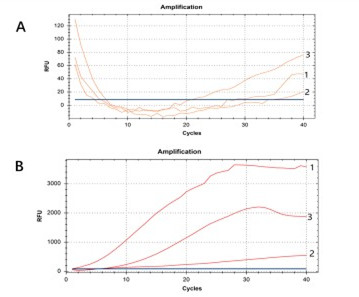


Figure 2 Selection results of primers with different sequences

1. 1-3 respectively represent the first pair, the second pair, and the third pair of primers of the group 2 sequence. (B) 1-3respectively represent the first pair, second pair, and third pair of primers in the group 7 sequence.

**
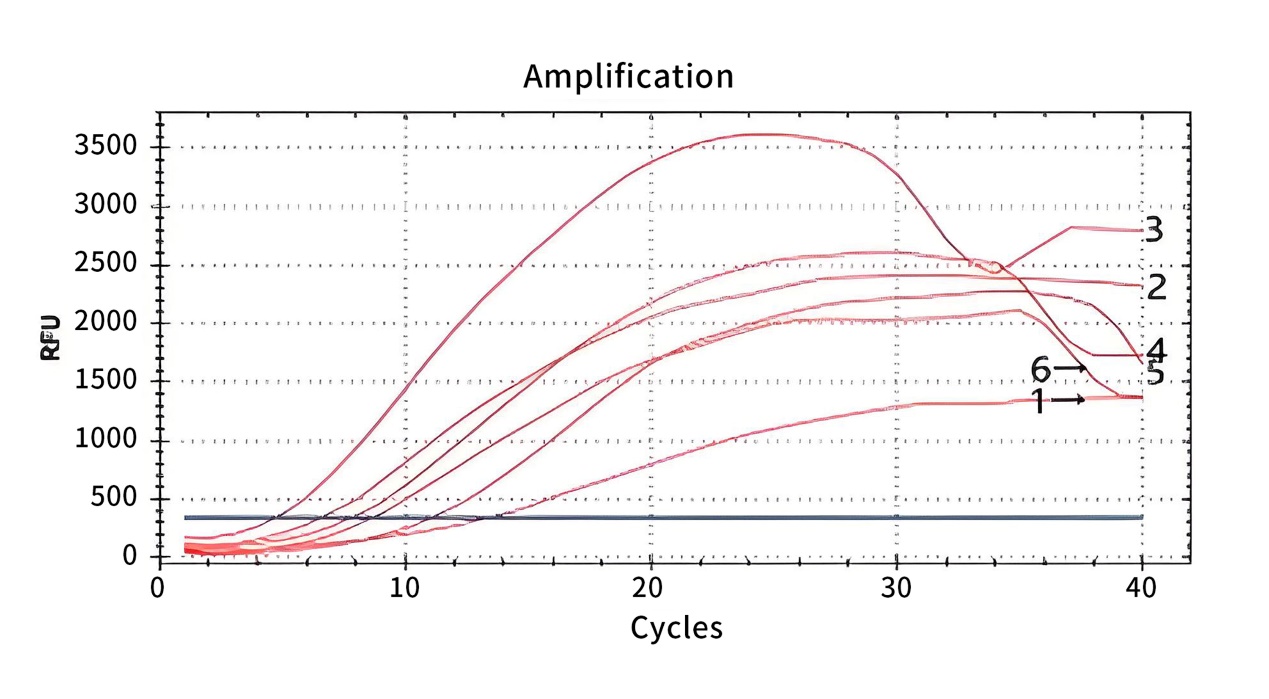
**

Figure 3 Optimization of fluorescence RPA reaction temperature. Curves 1-6 represents the  *B. microti* genomic DNA amplification profile of group 7 sequence at 37°C, 38°C, 39°C, 40°C, 41°C, and 42°C, respectively.


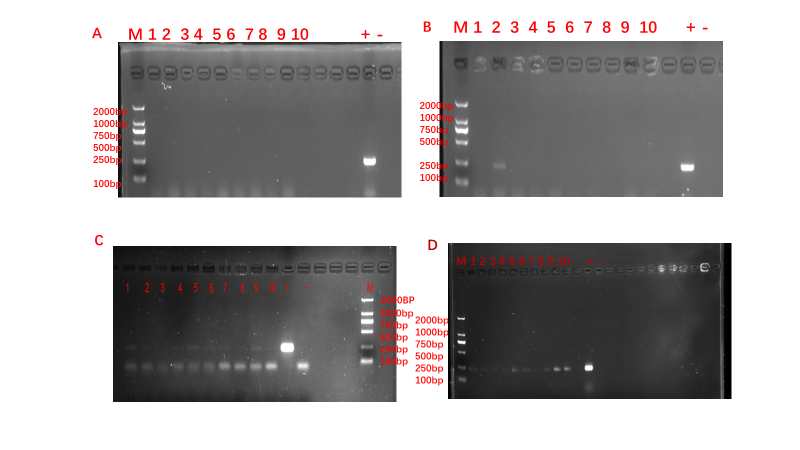


Figure 4 Results of nested PCR of *B. microti* infected in mouse models of post infection days

(A) 1-10 represent PCR results of 6th post infection days. All samples were negative. + represents positive control, - represents the negative control. (B) 1-10 represent PCR results of 9th post infection days, samples of No.2 was positive, and the other ones were negative. + represents positive control, - represents the negative control. (C) 1-10 represent PCR results of 12th post infection days, No.1,,No.2, No.4, No.5,No.6,No.7, No.9 samples were positive. + represents positive control, - represents the negative control. (d) 1-10 represent PCR results of 15th post infection days, all samples were positive. + represents positive control, - represents the negative control.
